# 1 **Divergence of piRNA pathway proteins affects piRNA biogenesis but not TE transcript** 2 **level**

3 Luyang Wang<sup>1</sup>, Daniel A. Barbash<sup>2</sup>, Erin S. Kelleher<sup>1</sup>

4 <sup>1</sup> Dept. Biology & Biochemistry, University of Houston, Houston, TX, USA

5 <sup>2</sup> Dept. Molecular Biology & Genetics, Cornell University, Ithaca, NY, USA

6

## 7 **SUMMARY**

8 In metazoan germlines, the piRNA pathway acts as a genomic immune system [1,2]:  
9 employing small-RNA mediated silencing to defend host DNA from the harmful effects of  
10 transposable elements (TEs). In response to dynamic changes in genomic TE content, host  
11 genomes are proposed to alter the piRNAs that they produce in order to silence the most active  
12 TE families [3–5]. However, piRNA pathway proteins, which execute piRNA biogenesis and  
13 enforce silencing of targeted sequences, also evolve rapidly and adaptively in animals [6,7]. If  
14 TE silencing evolves through changes in piRNAs, what necessitates changes in piRNA pathway  
15 proteins? Here we used interspecific complementation to test for functional differences between  
16 *Drosophila melanogaster* and *D. simulans* alleles of three adaptively evolving piRNA pathway  
17 proteins: Armitage, Aubergine and Spindle-E. Surprisingly, we find very few differences in TE  
18 transcript levels, but global effects on piRNA biogenesis, particularly for Armitage. Therefore,  
19 despite the fitness costs of transposition, piRNA effector proteins are not under selection to  
20 enhance TE silencing. Rather, our results suggest TE antagonism of host piRNA production.  
21 Furthermore, the absence of correlated downstream effects on TE transcripts suggest a  
22 fundamentally different relationship between piRNA abundance and TE transcript regulation  
23 between alleles. Finally, we reveal that *D. simulans* alleles exhibit enhanced off-target effects on  
24 host transcripts in a *D. melanogaster* background, suggesting the avoidance of genomic auto-  
25 immunity [8] as an additional target of selection. Taken together, our results point to multiple  
26 diverging functions, unveiling unexpected complexity in the molecular adaptation of piRNA  
27 pathway proteins.

28

## 29 **RESULTS AND DISCUSSION**

### 30 **Identifying functional divergence through interspecific complementation.**

31 To isolate functional differences between *D. melanogaster* and *D. simulans* alleles that  
32 result from adaptive evolution, we employed interspecific complementation, in which we  
33 compared the ability of each allele to complement a *D. melanogaster* mutant background. For  
34 each piRNA protein, Aubergine (Aub), Spindle-E (SpnE) and Armitage (Armi), we compared

1 three genotypes, 1) trans-heterozygous loss-of-function mutants, 2) mutants with a *D.*  
2 *melanogaster* genomic transgene rescue, and 3) mutants with *D. simulans* genomic transgene  
3 rescue. Phenotypes for which the *D. simulans* alleles fail to fully complement the mutant, or  
4 otherwise differ between the alleles of the two species, point to diverged functions that are  
5 potential targets of adaptive evolution.

6 Homozygosity or trans-heterozygosity for loss of function alleles in all three genes causes  
7 complete female sterility (Figure S1A) [9]. For all three proteins, fertility was only partially  
8 rescued by *D. simulans* transgene when compared to its *D. melanogaster* counterpart,  
9 indicating divergence in gene function (Figure S1A) [10]. Importantly, *D. simulans* transgenes do  
10 not exhibit significantly reduced expression when compared to *D. melanogaster* transgenes  
11 (Figure S1B), indicating that fertility effects reflect amino acid sequence divergence.

12

### 13 **Reduced piRNA abundance with *D. simulans* alleles.**

14 To uncover molecular phenotypes that relate to fertility differences, we first examined  
15 whether *D. melanogaster* and *D. simulans* alleles differed with respect to their functions in  
16 piRNA production. Biochemical functions of piRNA pathway proteins, including piRNA  
17 biogenesis, would be expected to evolve adaptively if TEs encode antagonists of piRNA-  
18 mediated silencing, or if TE-derived transcripts evolve to evade piRNA processing and  
19 associated silencing [8,11]. Aub and SpnE are involved in ping-pong biogenesis, which  
20 produces sense and antisense piRNAs from precursor transcripts through a homology-  
21 dependent amplification loop [3,12,13]. By contrast, *armi* alleles disrupt both ping-pong  
22 amplification and phased piRNA-biogenesis, which gives rise to piRNAs from a single strand  
23 through sequential cleavage by the nuclease Zucchini [14–17].

24 To determine the overall impact of adaptive protein evolution on piRNA production, we  
25 compared TE-derived piRNA abundance among mutants and transgenic rescues using small-  
26 RNA seq. For all three piRNA pathway mutants, transgenic rescue by both *D. melanogaster* and  
27 *D. simulans* alleles is associated with a dramatic increase in piRNAs for the majority of germline  
28 TE families, indicating an overall conservation of piRNA production (Figure 1A-C). Nevertheless,  
29 we uncovered allelic differences in the abundance of piRNAs from specific TE families,  
30 indicative of functional divergence between species. Importantly, we did not observe any  
31 systematic differences in expression for germline or soma-specific protein-coding genes  
32 between the transgenic rescues, indicating changes in piRNA abundance did not reflect a  
33 change in the germline-to-soma ratio (Figure S1B).

34 *armi* exhibited the most dramatic differences in piRNA abundance between alleles, with 81

1 of 84 TE families exhibiting reduced piRNA abundance in the *D. simulans* rescue when  
2 compared to *D. melanogaster* (Figure 1C and 1F). *D. simulans aub* was characterized by  
3 similar, but less dramatic reductions in piRNA biogenesis: of 10 TE families whose piRNA  
4 abundance differed between *D. melanogaster* and *D. simulans* alleles, 9 exhibited lower  
5 abundance in the *D. simulans* rescue (Figure 1A and 1D). By contrast, for *spnE*, less than half  
6 (11 of 25) of differentially abundant TE families exhibit reduced abundance in the *D. simulans*  
7 rescue when compared to *D. melanogaster* (Figure 1B and 1E), suggesting functional  
8 divergence does not result in systematically reduced functionality of *D. simulans* alleles in a *D.*  
9 *melanogaster* background.

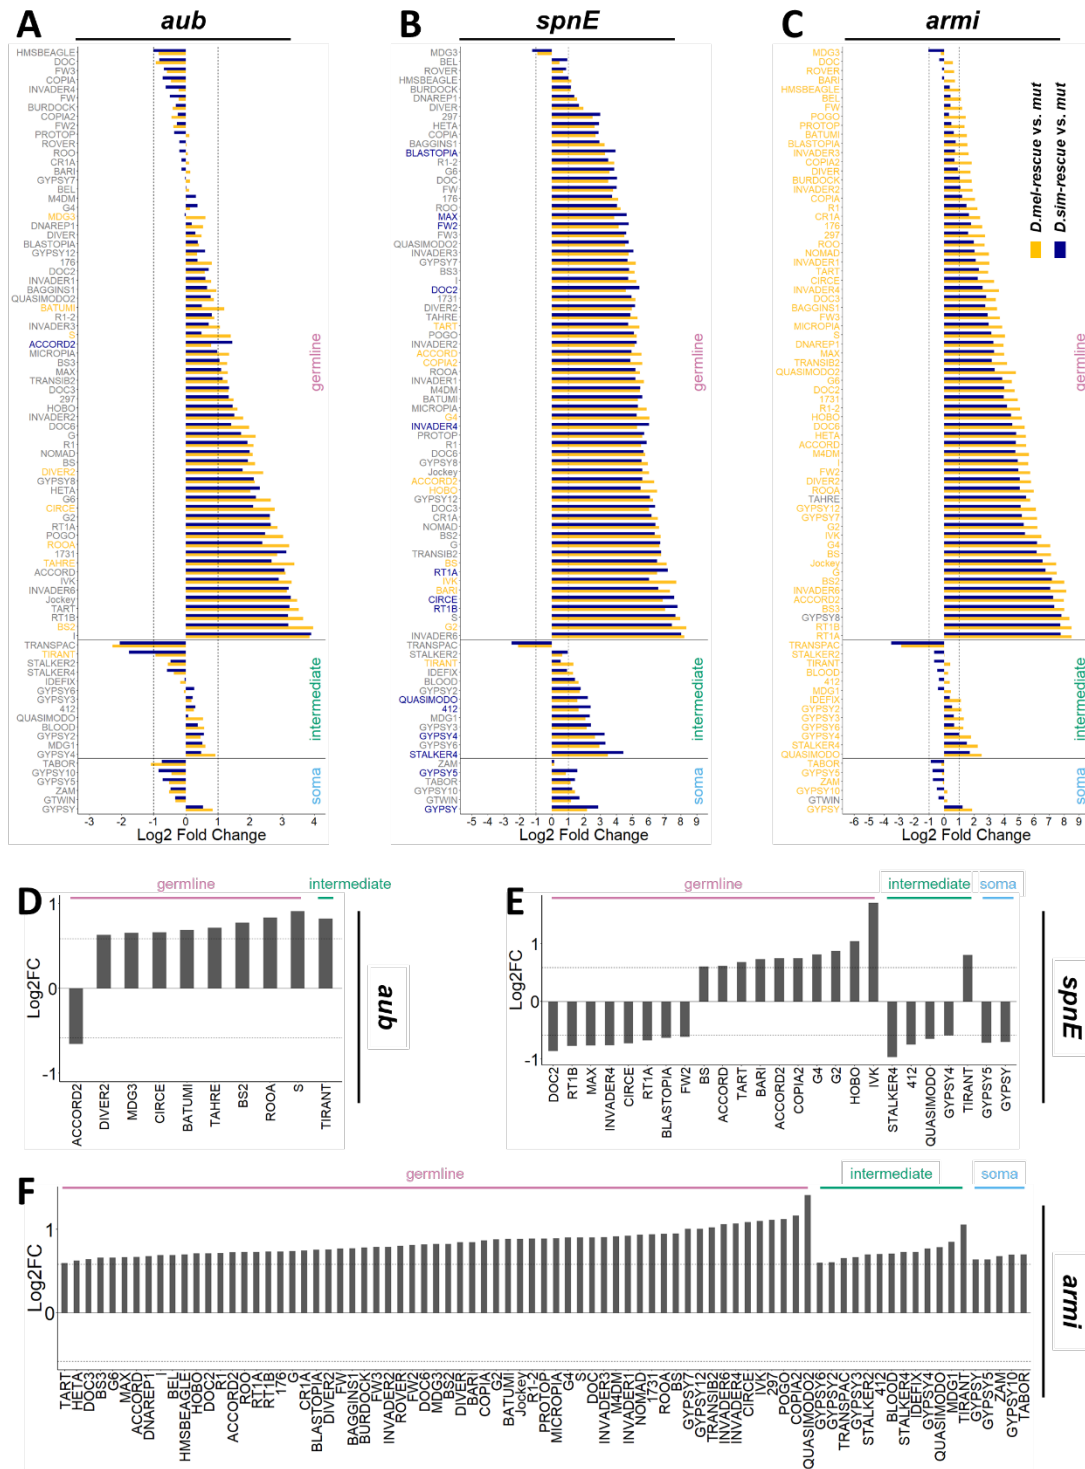

1  
 2 **Figure 1. *D. simulans armi* is characterized by a dramatic loss of TE-derived piRNAs.** (A-C) Log<sub>2</sub> fold-  
 3 change of TE-derived piRNA abundance in transgenic rescues as compared to trans-heterozygous  
 4 mutants for *aub*, *spnE* and *armi*. Dashed lines indicate the 2 fold-change threshold. TE families whose  
 5 TE-derived piRNA abundance differs between transgenic rescues (>1.5 fold, adjusted *p*-value < 0.05) are  
 6 indicated in yellow and blue, for TE families increased in *D. melanogaster* or *D. simulans* rescues,

1 respectively. (D-F) Log<sub>2</sub> fold-change for TE families whose TE-derived piRNAs are significantly  
2 differentially abundant between transgenic rescues. Dashed lines indicate the 1.5 fold-change threshold.  
3 TE families were grouped into germline-specific, soma-specific and intermediate [3]. Log<sub>2</sub> fold-change  
4 values are based on two biological replicates for *aub* and three biological replicates for *spnE* and *armi*.  
5 piRNA abundance for each TE family was normalized to the total number of sequenced miRNAs in the  
6 same library.

#### 8 **D. simulans alleles exhibit reduced piRNA biogenesis.**

9 To detect underlying differences in piRNA biogenesis, which could give rise to interallelic  
10 differences in piRNA abundance, we determined molecular signatures of ping-pong and phased  
11 piRNA biogenesis from our small RNA data. The frequency of ping-pong amplification was  
12 estimated by the fraction of piRNAs occurring on opposite strands of the TE consensus and  
13 whose sequences overlap by 10 bp, a reflection of the cleavage-site preference of the Piwi-  
14 Argonautes Aub and Argonaute-3 (Ago-3, Figure 2A) [3,12,18]. Similarly, phased biogenesis is  
15 detected from the fraction of piRNA 3' ends immediately followed by a Uracil residue (+1-U), as  
16 well as the frequency of piRNAs from the same strand that are separated by a single nucleotide  
17 (d1), both of which are diagnostic of cleavage by the nuclease Zucchini (Figure 2F) [16,17]. In  
18 general, ping-pong and phasing are inversely correlated in mutant piRNA pools, because  
19 reducing one mechanism of biogenesis leads to a proportional increase in the other [16,17].

20 Aub plays a direct role in ping-pong amplification by cleaving piRNA precursors (Figure  
21 2A) [3,12,18], and *spnE* is required for the localization of Aub into the perinuclear nuage, where  
22 ping-pong occurs [19]. Mutants for both genes exhibit a complete collapse of ping-pong  
23 amplification, as indicated by very low ping-pong fractions for all TE families (Figure 2B) [3,13].  
24 Similar to our observations with TE-derived piRNA abundance (Figure 1A-C), both *D.*  
25 *melanogaster* and *D. simulans aub* and *spnE* alleles confer a dramatic rescue of ping-pong  
26 biogenesis. Ping-pong fractions in the *D. simulans aub* rescue, however, are significantly lower  
27 than *D. melanogaster* (Figure 2B), revealing that reduced piRNA abundance associated with *D.*  
28 *simulans aub* (Figure 1D) is accompanied by reduced *aub*-dependent piRNA production. As a  
29 consequence of reduced ping-pong biogenesis, there is a corresponding increase in phased  
30 piRNA biogenesis in the *D. simulans* rescue (Figure 2G and 2H, Figure S2). By contrast, *D.*  
31 *melanogaster* and *D. simulans spnE* alleles do not substantially differ with respect to ping-pong  
32 (Figure 2B), which is consistent with the absence of a systematic loss of piRNAs in the  
33 presence of the *D. simulans* allele (Figure 1E). However, there is a modest but significant  
34 increase in the d1 proportion with the *D. simulans spnE* rescue (Figure 2G), suggesting a  
35 modest increase in phased biogenesis.

1           Armi is believed to bind to piRNA precursors [20,21], and is required for phased piRNA  
2 biogenesis [14,15,22,23]. Consistent with a role in phasing, +1-U and d1 are reduced in *armi*  
3 mutants (Figure 2G and 2H, Figure S2). *armi* is also required for ping-pong biogenesis for some  
4 TE families, suggesting that phased piRNA production produces substrates for ping-pong  
5 [3,24]. Ping-pong fractions are therefore decreased in *armi* transgenic rescues for some TE  
6 families, and increased in others (Figure 2C and 2D). Consistent with the global reduction of TE-  
7 derived piRNAs (Figure 1C), the *D. simulans armi* rescue is characterized by modest reduction  
8 in phased biogenesis (Figure 2H, Figure S2). However, in contrast to loss-of-function mutants,  
9 ping-pong fractions are also reduced for most TE families in the *D. simulans* rescue when  
10 compared to *D. melanogaster* regardless of whether *armi* is required for ping-pong biogenesis  
11 (Figure 2C-E). Therefore, *D. simulans armi* enacts a global inhibitory effect on ping-pong. While  
12 we did not investigate the molecular basis for this inhibition, it could be mediated through Armi's  
13 physical interaction with Ago-3 and Aub [25]. If *D. simulans* Armi exhibits enhanced affinity for  
14 its binding partners, it could antagonize them from their functions in ping-pong biogenesis.

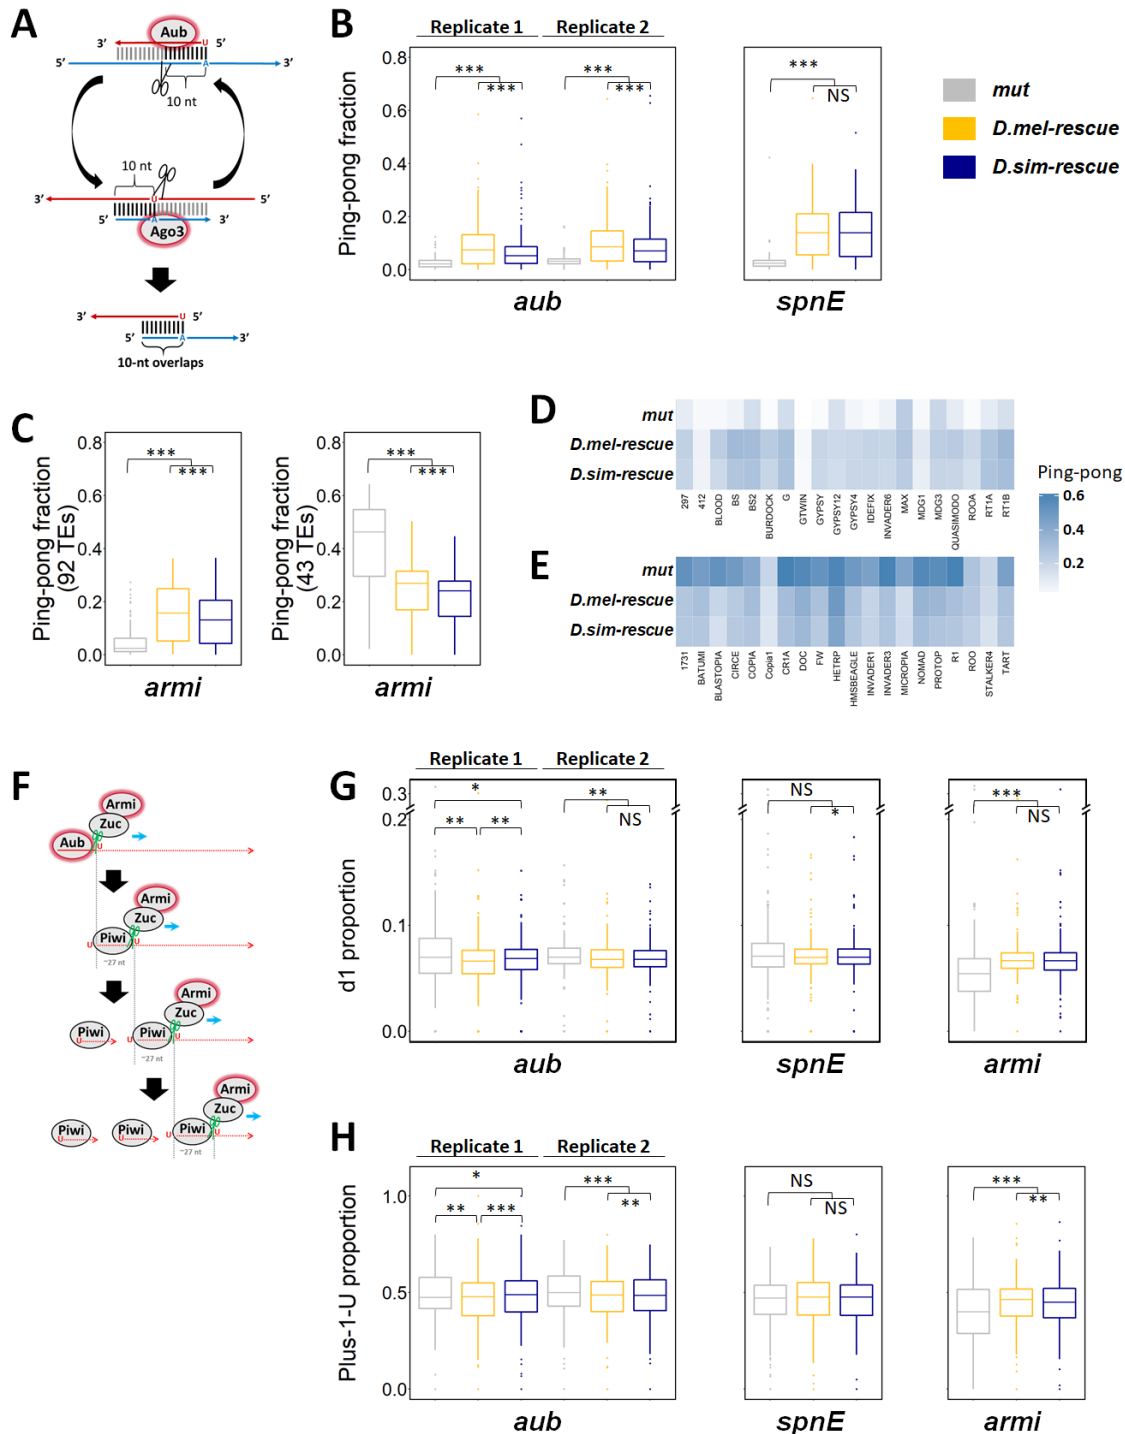

1  
 2 **Figure 2. *D. simulans* alleles reduce ping-pong biogenesis and phased biogenesis.** (A) Ping-pong  
 3 amplification loop. (B) Ping-pong fractions of TE-derived piRNAs are compared between trans-  
 4 heterozygous mutants and transgenic rescues for *aub* and *spnE*. (C) Ping-pong fractions of TE-derived  
 5 piRNAs are compared between trans-heterozygous mutants and transgenic rescues for *armi*.  
 6 Comparison for 92 and 43 TE families whose ping-pong fractions are decreased (left) or increased (right),



1 respectively, in *armi* mutant as compared to those in *D. melanogaster* transgenic rescue are shown. (D)  
2 Ping-pong fraction heat map for 20 most piRNA-abundant TE families from panel C left. (E) Ping-pong  
3 fraction heat map for 20 most piRNA-abundant TE families from panel C right. (F) Zuc-dependent phased  
4 piRNA biogenesis. (G) Proportions of 1 nt distance between adjacent piRNAs (d1) mapped to the TE  
5 consensus sequences are compared between each genotype of each gene. Note the break in the Y-axes.  
6 (H) Proportions of uridine residue immediately after the 3' ends of piRNAs (+1-U) mapped to the TE  
7 consensus sequences are compared between each genotype of each gene. Statistical significance was  
8 assessed by the Wilcoxon signed-rank test. For *aub*, two biological replicates of each genotype  
9 generated at different times are shown separately. For *spnE* and *armi*, average of three biological  
10 replicates of each genotype generated at the same time are shown. NS denotes  $p > 0.05$ . \*, \*\*, and \*\*\*  
11 denote  $p \leq 0.05$ ,  $p \leq 0.01$ ,  $p \leq 0.001$ , respectively.

12  
13  
14

### 15 **piRNA biogenesis defects in *D. simulans* are not associated with TE derepression.**

16 Ultimately, the piRNA pathway represses TEs by repressing their transcripts (reviewed  
17 in [1]). Enhanced negative regulation of TE transcripts therefore presents an obvious target of  
18 positive selection acting on piRNA pathway proteins. Furthermore, given the reduced  
19 abundance of TE-derived piRNAs in the *D. simulans aub* and particularly *armi* rescues,  
20 deregulation is expected among their downstream targets. We therefore compared TE transcript  
21 abundance between mutants and transgenic rescues using mRNA-seq (*aub*) and stranded total-  
22 RNA seq (*spnE* and *armi*).

23 For all three proteins, both *D. melanogaster* and *D. simulans* transgenic rescues reduce  
24 transcript abundance from almost all TE families when compared to the corresponding mutant  
25 (Figure 3A-C). However, it is very striking that despite having significant differences in TE-  
26 derived piRNAs, most TE families are not differentially expressed between *D. melanogaster* and  
27 *D. simulans* transgenic rescues. Across all three proteins studied, we identified no more than 16  
28 TE families that are differentially expressed (Figure 3D-F) [10]. Furthermore, the *D. simulans*  
29 transgene is associated with reduced rather than increased TE expression for 13 of these TE  
30 families (Figure 3D-F). This observation is particularly unexpected for *armi*, where defects of *D.*  
31 *simulans* alleles in ping-pong and phased biogenesis lead to a dramatic loss of TE-derived  
32 piRNAs (Figure 1C, 2B, 2D and 2E). *D. simulans* alleles therefore appear to enact more efficient  
33 piRNA-mediated silencing, conferring equivalent regulation of TE transcripts despite reduced  
34 piRNA abundance.

35 A fundamentally different relationship between piRNA abundance and TE transcript  
36 regulation between *D. melanogaster* and *D. simulans* alleles is further supported by comparing  
37 changes in piRNAs and TE transcripts. Because piRNAs are both produced from and regulate



1 TE transcripts, these two pools of RNAs covary in meaningful ways. In *aub* and *spnE* mutants,  
2 where the cleavage of TE transcripts by the ping-pong cycle is lost (Figure 2A and 2B), reduced  
3 antisense piRNAs are associated with increased TE transcript abundance (Figure S3). By  
4 contrast, in *armi* mutants, increased antisense TE transcription correlates with minimal loss of  
5 piRNAs, most likely because the presence of transcripts from both strands drives forward ping-  
6 pong biogenesis (Figure 2A, Figure S3). Strikingly, however, despite the very different effects of  
7 *armi* versus *aub* and *spnE* on piRNA biogenesis, in all three cases correlated changes between  
8 piRNA pools and mRNA pools are not observed in comparisons between the two transgenic  
9 rescues (Figure S3). This indicates again that the *D. simulans* alleles have altered, not simply  
10 reduced, function. Furthermore, these functional changes in the *D. simulans* alleles on the  
11 piRNA pool are complex and do not translate to altered TE transcription in a predictable way,  
12 and *vice versa*.

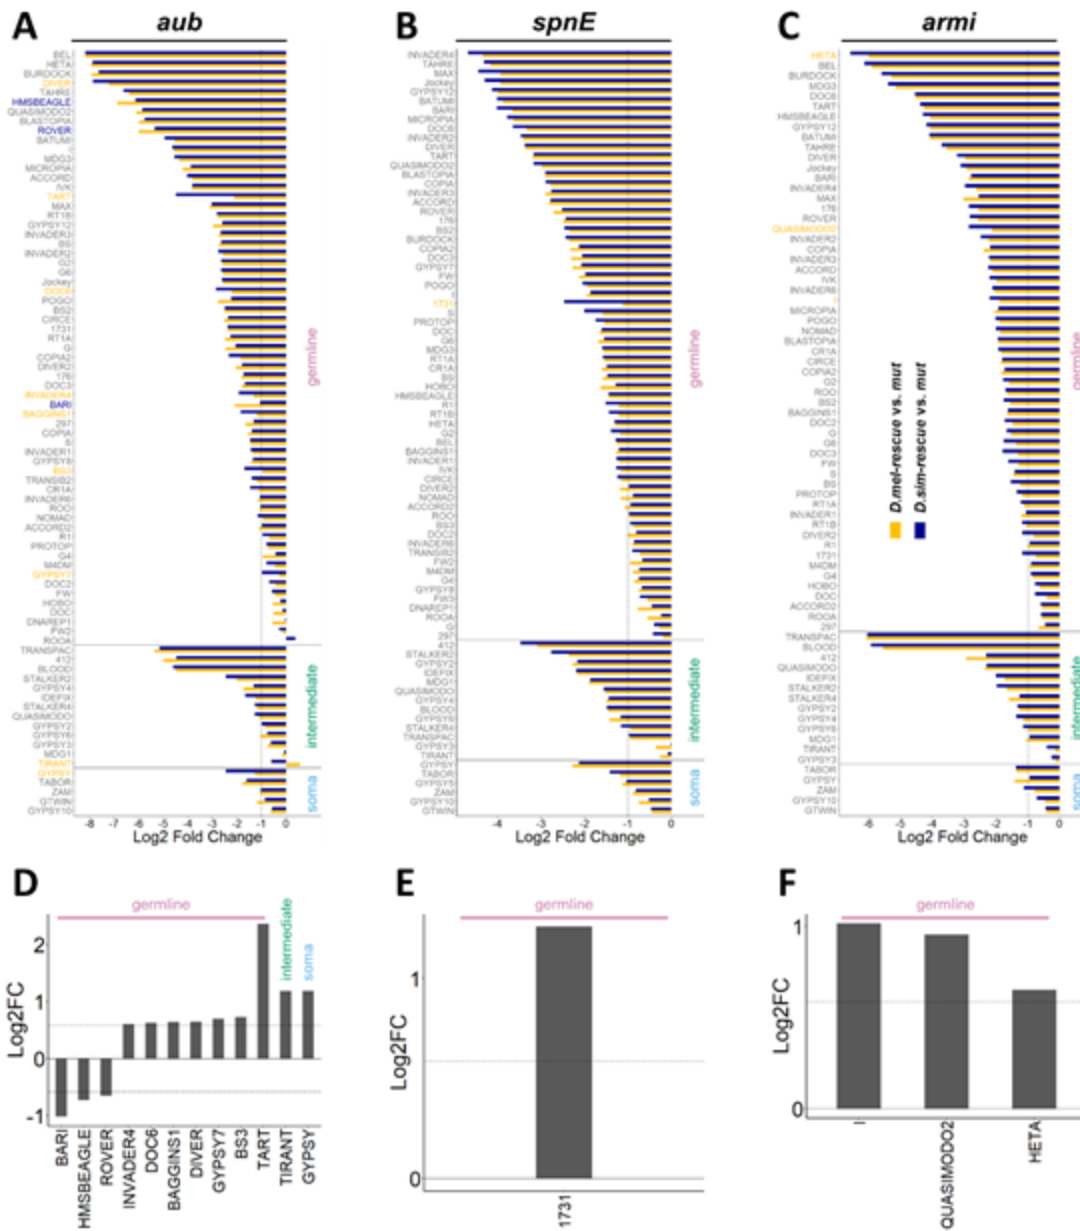

1  
 2 **Figure 3. Negative transcriptional regulation of TEs is mostly conserved between species.** (A-C) Log<sub>2</sub>  
 3 fold-change of TE transcript abundance in transgenic rescue as compared to trans-heterozygous  
 4 mutants for *aub*, *spnE* and *armi*. Dashed lines indicate the log<sub>2</sub> transformed fold-change threshold of 2.  
 5 TE families whose TE transcript abundance significantly differs between transgenic rescues (>1.5 fold,  
 6 adjusted *p*-value < 0.05) are indicated in yellow and blue for TE families increased in *D. melanogaster* or  
 7 *D. simulans* rescues, respectively. (D-F) Log<sub>2</sub> fold-change for TE families that are differentially abundant  
 8 between transgenic rescues. Dashed lines indicate the 1.5 fold-change threshold. TE families were  
 9 grouped into germline-specific, soma-specific and intermediate [3]. Log<sub>2</sub> fold-change values were based  
 10 on one biological replicate for *aub* and three biological replicates for *spnE* and *armi*, and were obtained  
 11 from a combined DESeq2 analysis that included both TEs and protein-coding genes.  
 12

1 **Increased off-target effects of *D. simulans* alleles suggest genomic auto-immunity.**

2 piRNA-mediated silencing can potentially be deleterious if off-target effects silence host  
3 protein-coding genes. Avoidance of this genomic auto-immunity syndrome is an alternative,  
4 non-TE centered hypothesis to explain the adaptive evolution of piRNA pathway proteins [8,26].  
5 If piRNA proteins experience selection to minimize auto-immunity, a greater number of off-target  
6 effects are predicted to occur with the *D. simulans* rescue, which is not adapted to the *D.*  
7 *melanogaster* background. We therefore examined the number of protein-coding genes that are  
8 negatively regulated by piRNA pathway proteins, by comparing their expression levels in  
9 mutants and transgenic rescues. Protein-coding genes whose expression is significantly  
10 reduced in transgenic rescues (>1.5 fold) indicate candidate off-target effects of piRNA-  
11 mediated silencing. We observed that for *aub* and *armi*, a significantly greater number of  
12 protein-coding genes have reduced expression in the presence of the *D. simulans* transgene  
13 than the *D. melanogaster* transgene (Figure 4). *Drosophila simulans spnE* alleles are also  
14 associated with a greater number of negatively regulated protein-coding genes, but the  
15 difference is not statistically significant ( $p = 0.11$ ). These observations suggest that *D. simulans*  
16 alleles are poorly adapted to avoid off-target effects in a *D. melanogaster* background,  
17 consistent with the auto-immunity hypothesis.

18 Increased off-target effects of *D. simulans* alleles on protein-coding genes could be  
19 explained by increased production of protein-coding derived piRNAs, or enhanced silencing of  
20 target mRNAs. To differentiate between these alternatives, we compared protein-coding derived  
21 piRNAs between transgenic rescues. *D. simulans* transgenic rescues of *aub* and *armi* exhibit  
22 fewer protein-coding genes with increased piRNA abundance (>1.5 fold) when compared to  
23 mutants than *D. melanogaster* transgenic rescues (Figure S4A). Furthermore, the magnitude of  
24 increased protein-coding piRNA production is not higher in *D. simulans* than *D. melanogaster*  
25 transgenic rescues (Figure S4B). Therefore, similar to our observations with TEs, enhanced  
26 negative regulation by *D. simulans* alleles does not reflect increased production of piRNAs.

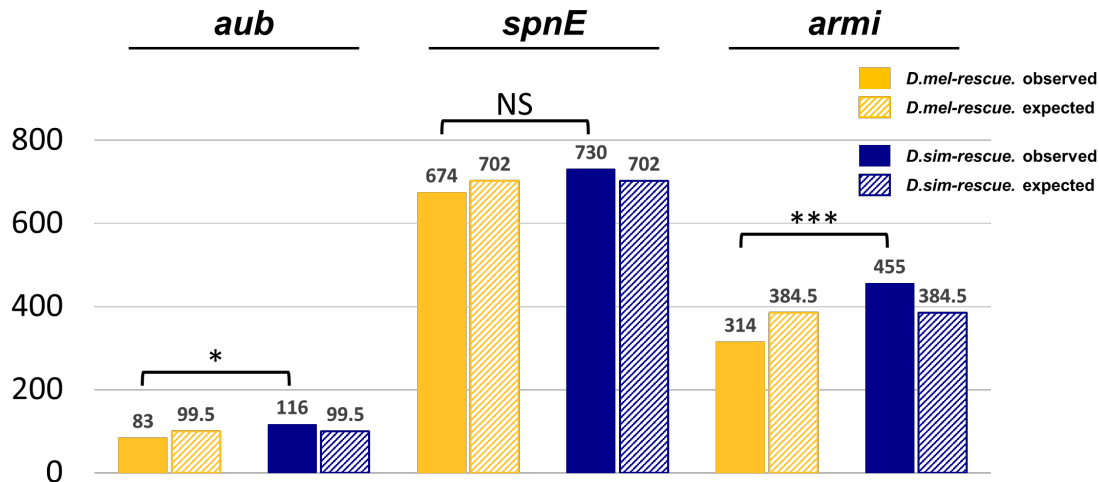

1  
2 **Figure 4. Negative regulation of protein-coding genes suggests increased genomic auto-immunity of *D.***  
3 ***simulans* alleles.** The number of genes whose expression levels are decreased (>1.5 fold) in the presence  
4 of each transgene as compared to the corresponding mutant. Log<sub>2</sub> fold-change values were based on  
5 one biological replicate for *aub* and three biological replicates for *spnE* and *armi*, and were obtained  
6 from a DESeq analysis for *aub* and a DESeq2 analysis for *spnE* and *armi* (adjusted  $p < 0.05$ ). Statistical  
7 significance was assessed by the Pearson's Chi-squared Test of Independence, where NS denotes  $p >$   
8 0.05. \* denotes  $p \leq 0.05$ . \*\*\* denotes  $p \leq 0.001$ .  
9

## 10 **Conclusion**

11 Despite pervasive adaptive evolution and gene duplication among piRNA pathway  
12 proteins in both insect and vertebrate lineages [6,7,27–30], the underlying forces that drive  
13 these evolutionary dynamics remain unclear. Transposable elements are potentially implicated  
14 in positive selection on piRNA pathway proteins in two ways [8,30]. First, changes in genomic  
15 TE activity or composition could select for enhanced TE silencing. Second, TE-encoded  
16 antagonists of silencing could reduce piRNA pathway protein function, selecting for novel  
17 protein variants that escape antagonism. Escape from TE-encoded antagonist proteins was  
18 recently proposed as a driver of adaptive evolution in Rhino, a heterochromatic protein that  
19 defines piRNA producing sites in *Drosophila* genomes [11,31–33]. While the TE-encoded  
20 antagonist remains to be elucidated, adaptive evolution in *rhino* has resulted in an  
21 incompatibility between *D. simulans* Rhino and *D. melanogaster* allele of its interacting partner  
22 Deadlock [11,34]. We propose that a similar phenomenon may impact the functions of *D.*  
23 *simulans* Aub and particularly Armi in a *D. melanogaster* background, impacting the physical  
24 interactions that mediate piRNA biogenesis. In addition to divergence with respect to piRNA  
25 biogenesis, we provide the first evidence of interspecific divergence in genomic auto-immunity  
26 [8,26], with *D. simulans* alleles causing enhanced off-target effects compared to their *D.*

1 *melanogaster* counterparts.

2

### 3 **STAR METHODS**

4 Detailed methods are provided in the online version of this paper and include the following:

- 5 ● KEY RESOURCES TABLE
- 6 ● CONTACT FOR REAGENT AND RESOURCE SHARING
- 7 ● EXPERIMENTAL MODEL AND SUBJECT DETAILS
- 8 ● METHOD DETAILS
  - 9 ○ Generation of Transgenic Lines
  - 10 ○ Complementation assay of female fertility
  - 11 ○ Small RNA-Seq
  - 12 ○ RNA-Seq
  - 13 ● QUANTIFICATION AND STATISTICAL ANALYSIS
    - 14 ○ Bioinformatic analysis of small RNA-Seq libraries
    - 15 ○ Bioinformatic analysis of RNA-Seq libraries
    - 16 ○ Ping-pong analysis
    - 17 ○ Phasing analysis

18

19

### 20 **KEY RESOURCES TABLE**

| REAGENT or RESOURCE                           | SOURCE     | IDENTIFIER |
|-----------------------------------------------|------------|------------|
| Chemicals, Peptides, and Recombinant Proteins |            |            |
| iProof high-fidelity taq DNA polymerase       | Bio-Rad    | #1725301   |
| Trizol reagent                                | Invitrogen | #15596026  |
| poly-T Dynabeads                              | Invitrogen | #61002     |
| fragmentation buffer                          | Ambion     | #AM8740    |
| Superscript II                                | Invitrogen | #18064014  |

|                                                                                                                                                                                    |            |           |
|------------------------------------------------------------------------------------------------------------------------------------------------------------------------------------|------------|-----------|
| DNA polymerase I                                                                                                                                                                   | Promega    | #M2051    |
| Klenow enzyme                                                                                                                                                                      | NEB        | #M0212S   |
| Critical Commercial Assays                                                                                                                                                         |            |           |
| NEBNext Multiplex Small RNA Library Prep Set for Illumina                                                                                                                          | NEBNext    | #E7300S   |
| TruSeq® Stranded Total RNA Library Prep                                                                                                                                            | Illumina   | #20020596 |
| MinElute gel purification kit                                                                                                                                                      | Qiagen     | #28604    |
| End-IT DNA repair kit                                                                                                                                                              | Epicentre  | #ER0720   |
| Experimental Models: Organisms/Strains                                                                                                                                             |            |           |
| <i>D. melanogaster</i> : w/yw;<br><i>aub</i> <sup>N11</sup> <i>bw</i> <sup>1</sup> / <i>aub</i> <sup>HN</sup> <i>bw</i> <sup>1</sup>                                               | [10]       | N/A       |
| <i>D. melanogaster</i> : w/yw;<br><i>aub</i> <sup>N11</sup> <i>bw</i> <sup>1</sup> / <i>aub</i> <sup>HN</sup> <i>bw</i> <sup>1</sup> ; $\Phi P\{D.$<br><i>melanogaster aub}\/+</i> | [10]       | N/A       |
| <i>D. melanogaster</i> : w/yw;<br><i>aub</i> <sup>N11</sup> <i>bw</i> <sup>1</sup> / <i>aub</i> <sup>HN</sup> <i>bw</i> <sup>1</sup> ; $\Phi P\{D.$<br><i>simulans aub}\/+</i>     | [10]       | N/A       |
| <i>D. melanogaster</i> : yw;<br><i>spnE</i> <sup>1</sup> / <i>spnE</i> <sup>his-03987</sup>                                                                                        | This paper | N/A       |
| <i>D. melanogaster</i> : yw;<br><i>spnE</i> <sup>1</sup> / <i>spnE</i> <sup>his-03987</sup> ; $\Phi P\{D.$<br><i>melanogaster spnE}\/+</i>                                         | This paper | N/A       |
| <i>D. melanogaster</i> : yw;<br><i>spnE</i> <sup>1</sup> / <i>spnE</i> <sup>his-03987</sup> ; $\Phi P\{D.$<br><i>simulans spnE}\/+</i>                                             | This paper | N/A       |

|                                                                                                                                         |            |         |
|-----------------------------------------------------------------------------------------------------------------------------------------|------------|---------|
| <i>D. melanogaster</i> : w/yw;<br><i>armi</i> <sup>1</sup> / <i>armi</i> <sup>72.1</sup>                                                | This paper | N/A     |
| <i>D. melanogaster</i> : w/yw;<br><i>armi</i> <sup>1</sup> / <i>armi</i> <sup>72.1</sup> ; $\Phi P\{D.$<br><i>melanogaster armi\}/+</i> | This paper | N/A     |
| <i>D. melanogaster</i> : w/yw;<br><i>armi</i> <sup>1</sup> / <i>armi</i> <sup>72.1</sup> ; $\Phi P\{D. simulans$<br><i>armi\}/+</i>     | This paper | N/A     |
| Oligonucleotides                                                                                                                        |            |         |
| <i>spnE</i> -forward primer:<br>ATTGAACGCCGTCTATGCC<br>AAGC                                                                             | This paper | N/A     |
| <i>spnE</i> -reverse primer- <i>D.mel</i> /<br><i>D.sim</i> :<br>ACTGTTCCGCCATTGCCACA<br>GATTG                                          | This paper | N/A     |
| <i>armi</i> -forward primer:<br>CACCGCTGAAAGATACGCA<br>CACG                                                                             | This paper | N/A     |
| <i>armi</i> -reverse primer- <i>D.mel</i> :<br>GCTAGCCTGCGCTTGGGA<br>GTGTTACCATTG                                                       | This paper | N/A     |
| <i>armi</i> -reverse primer- <i>D.sim</i> :<br>GCTAGCCTGACCTCGGGA<br>GTGTTACCACTTC                                                      | This paper | N/A     |
| Recombinant DNA                                                                                                                         |            |         |
| pCR-Blunt-II-Topo                                                                                                                       | Invitrogen | K280002 |
| pCasper4/attB                                                                                                                           | [35]       |         |



| Software and Algorithms |      |                                                                                                                                               |
|-------------------------|------|-----------------------------------------------------------------------------------------------------------------------------------------------|
| Cutadapt                | [36] | <a href="https://cutadapt.readthedocs.io/en/stable/index.html">https://cutadapt.readthedocs.io/en/stable/index.html</a>                       |
| Bowtie                  | [37] | <a href="http://bowtie-bio.sourceforge.net/index.shtml">http://bowtie-bio.sourceforge.net/index.shtml</a>                                     |
| Bowtie2                 | [38] | <a href="http://bowtie-bio.sourceforge.net/bowtie2/index.shtml">http://bowtie-bio.sourceforge.net/bowtie2/index.shtml</a>                     |
| DESeq                   | [39] | <a href="https://bioconductor.org/packages/release/bioc/html/DESeq.html">https://bioconductor.org/packages/release/bioc/html/DESeq.html</a>   |
| DESeq2                  | [40] | <a href="https://bioconductor.org/packages/release/bioc/html/DESeq2.html">https://bioconductor.org/packages/release/bioc/html/DESeq2.html</a> |
| TopHat                  | [41] | <a href="http://ccb.jhu.edu/software/tophat/index.shtml">http://ccb.jhu.edu/software/tophat/index.shtml</a>                                   |
| HTseq-count             | [42] | <a href="https://htseq.readthedocs.io/en/master/count.html">https://htseq.readthedocs.io/en/master/count.html</a>                             |

1

2

3

#### 4 **CONTACT FOR REAGENT AND RESOURCE SHARING**

5 Further information and requests for resources and reagents should be directed to and will be  
6 fulfilled by the Lead Contact, Erin S. Kelleher ([eskelleher@uh.edu](mailto:eskelleher@uh.edu)).

7

#### 8 **EXPERIMENTAL MODEL AND SUBJECT DETAILS**

9 All *Drosophila* strains were reared at room temperature on standard cornmeal media.

10 For the studies of *aubergine* (*aub*), the following *D. melanogaster* strains were used: *w*;  
11 *aub<sup>N11</sup> bw<sup>1</sup>/CyO, yw*; *aub<sup>HN</sup> bw<sup>1</sup>/CyO, yw*; *aub<sup>HN</sup> bw<sup>1</sup>/CyO; ΦP{D. melanogaster aub}, yw*; *aub<sup>HN</sup>*

1 *bw*<sup>1</sup>/CyO;  $\Phi P\{D. simulans aub\}$ . *w*; *aub*<sup>N11</sup> *bw*<sup>1</sup>/CyO, was a gift from Paul MacDonald. *yw*; *aub*<sup>HN</sup>  
2 *bw*<sup>1</sup>/CyO was obtained by extracting *yw* into *aub*<sup>HN</sup> *bw*<sup>1</sup>/CyO (Bloomington *Drosophila* Stock  
3 Center #8517). *yw*; *aub*<sup>HN</sup> *bw*<sup>1</sup>/CyO;  $\Phi P\{D. melanogaster aub\}$  and *yw*; *aub*<sup>HN</sup> *bw*<sup>1</sup>/CyO;  $\Phi P\{D.$   
4 *simulans aub\}, originally generated in Kelleher et al [10], were backcrossed for 6 generations in  
5 *yw*; *aub*<sup>HN</sup> *bw*<sup>1</sup>/CyO to minimize background effects that could lead to differences between  
6 transgenic stocks that were unrelated to the transgenes.*

7 For the studies of *spindle-E* (*spnE*), the following *D. melanogaster* strains were used:  
8 *yw*; *spnE*<sup>1</sup>/TM6, *yw*; *spnE*<sup>hls-03987</sup>/TM6, *yw*; *spnE*<sup>hls-03987</sup>/TM6;  $\Phi P\{D. melanogaster spnE\}$ , *yw*;  
9 *spnE*<sup>hls-03987</sup>/TM6;  $\Phi P\{D. simulans spnE\}$ . *yw*; *spnE*<sup>1</sup>/TM6 and *yw*; *spnE*<sup>hls-03987</sup>/TM6 were  
10 obtained by crossing *spnE*<sup>1</sup>/TM3 and *spnE*<sup>hls-03987</sup>/TM3 (gifts from Celeste Berg) to *yw*;  
11 TM3/TM6. To generate *yw*; *spnE*<sup>hls-03987</sup>/TM6;  $\Phi P\{D. melanogaster spnE\}$  and *yw*; *spnE*<sup>hls-</sup>  
12 <sup>03987</sup>/TM6;  $\Phi P\{D. simulans spnE\}$ , *w*<sup>1118</sup>;  $\Phi P\{D. melanogaster spnE\}$  and *w*<sup>1118</sup>;  $\Phi P\{D. simulans$   
13 *spnE\} were first crossed to *yw*: TM3/TM6. +/TM6;  $\Phi P\{D. melanogaster spnE\}/+$  and +/TM6;  
14  $\Phi P\{D. simulans spnE\}/+$  offspring were then crossed to *yw*; *spnE*<sup>hls-03987</sup>/TM3. Finally, *yw*;  
15 *spnE*<sup>hls-03987</sup>/TM6;  $\Phi P\{D. melanogaster spnE\}/+$  and *yw*; *spnE*<sup>hls-03987</sup>/TM6;  $\Phi P\{D. simulans$   
16 *spnE\}/+ offspring were backcrossed into *yw*; *spnE*<sup>hls-03987</sup>/TM6 for 6 generations, and  
17 subsequently homozygosed for the transgene, to minimize background effects.**

18 For the studies of *armitage* (*armi*), the following *D. melanogaster* strains were used: *yw*;  
19 *armi*<sup>1</sup>/TM6, *w*; *armi*<sup>72.1</sup>/TM6, *w*; *armi*<sup>72.1</sup>/TM6;  $\Phi P\{D. melanogaster armi\}$ , *w*; *armi*<sup>72.1</sup>/TM6;  $\Phi P\{D.$   
20 *simulans armi\}. *yw*; *armi*<sup>1</sup>/TM6 was obtained by crossing *yw*; *armi*<sup>1</sup>/TM3 (Bloomington  
21 *Drosophila* Stock Center #8513) to *yw*; TM3/TM6. *w*; *armi*<sup>72.1</sup>/TM6 was obtained from  
22 Bloomington *Drosophila* Stock Center (#8544). To generate *w*; *armi*<sup>72.1</sup>/TM6;  $\Phi P\{D.$   
23 *melanogaster armi\} and *w*; *armi*<sup>72.1</sup>/TM6;  $\Phi P\{D. simulans armi\}$ , *w*<sup>1118</sup>;  $\Phi P\{D. melanogaster$   
24 *armi\} and *w*<sup>1118</sup>;  $\Phi P\{D. simulans armi\}$  were first crossed to *yw*; TM3/TM6. +/TM3;  $\Phi P\{D.$   
25 *melanogaster armi\}/+ and +/TM3;  $\Phi P\{D. simulans armi\}/+$  offspring were then crossed to *w*;  
26 *armi*<sup>72.1</sup>/TM6. Finally, *w*; *armi*<sup>72.1</sup>/TM3;  $\Phi P\{D. melanogaster armi\}/+$  and *w*; *armi*<sup>72.1</sup>/TM3;  $\Phi P\{D.$   
27 *simulans armi\}/+ were backcrossed into *w*; *armi*<sup>72.1</sup>/TM6 for 6 generations, and subsequently  
28 homozygosed for the transgene, to minimize background effects.*****

29 Experimental genotypes were obtained from the following crosses. For studies of *aub*,  
30 virgin females *w*; *aub*<sup>N11</sup> *bw*<sup>1</sup>/CyO were crossed to (1) *yw*; *aub*<sup>HN</sup> *bw*<sup>1</sup>/CyO, (2) *yw*; *aub*<sup>HN</sup>  
31 *bw*<sup>1</sup>/CyO;  $\Phi P\{D. melanogaster aub\}$  or (3) *yw*; *aub*<sup>HN</sup> *bw*<sup>1</sup>/CyO;  $\Phi P\{D. simulans aub\}$  males. For  
32 studies of *spnE*, virgin females *yw*; *spnE*<sup>1</sup>/TM6 were crossed to (1) *yw*; *spnE*<sup>hls-03987</sup>/TM6, (2) *yw*;  
33 *spnE*<sup>hls-03987</sup>/TM6;  $\Phi P\{D. melanogaster spnE\}$  or (3) *yw*; *spnE*<sup>hls-03987</sup>/TM6;  $\Phi P\{D. simulans$   
34 *spnE\} males. For studies of *armi*, virgin females *yw*; *armi*<sup>1</sup>/TM6 were crossed to (1) *w*;*

1 *armi*<sup>72.1</sup>/TM6, (2) *w*; *armi*<sup>72.1</sup>/TM6;  $\Phi P\{D. melanogaster\}$  *armi* or (3) *w*; *armi*<sup>72.1</sup>/TM6;  $\Phi P\{D.$   
2 *simulans armi*} males. Crosses were maintained at 25°C on standard cornmeal media.

## 4 **METHOD DETAILS**

### 5 **Generation of Transgenic Lines**

6 To introduce *D. melanogaster* and *D. simulans* alleles into *D. melanogaster*, we used  $\Phi C31$   
7 integrase-mediated transgenesis system [43], which allows for site-specific integration. To  
8 generate transgenes for site specific integration, the gene and flanking regulatory regions of  
9 *spnE* (~9.7Kb, *D. melanogaster* Release 6, 3R:15835349..15845065; *D. simulans* Release 2,  
10 3R:9575537..9585081) [44,45] and *armi* (~6Kb, *D. melanogaster* Release 6,  
11 3L:3460305..3466368; *D. simulans* Release 2, 3L:3357002..3363099) [44,45] were PCR-  
12 amplified by using corresponding primers (see KEY RESOURCES TABLE) and iProof high-  
13 fidelity taq DNA polymerase (Bio-Rad). The PCR products were cloned into pCR-Blunt-II-Topo  
14 according to manufacturer instructions (Invitrogen). Mutation-free clones were verified by  
15 sequencing.

16 attB containing constructs used for site-specific integration were generated by subcloning  
17 the NotI/BamHI fragment of each *spnE* TOPO plasmid, and the NotI/NheI fragment of each *armi*  
18 TOPO plasmid into NotI/BamHI and NotI/XbaI-linearized pCasper4/attB, respectively. *spnE* and  
19 *armi* transgenic constructs were introduced into *D. melanogaster* at the P{CaryP}attP40 site,  
20 and site-specific integration of transgenes was confirmed by PCR [46]. The resulting transgenes  
21 were made homozygous in *D. melanogaster* *w*<sup>1118</sup>.

### 23 **Female fertility**

24 25-35 individual virgin females of each experimental genotype were crossed to two *ywF10*  
25 males on standard cornmeal media at 25°C. Fresh media and new males were provided every 5  
26 days. The number of progeny from each 5-day period was quantified.

### 28 **Small RNA-Seq**

29 3-6-day old female ovaries were dissected from each experimental genotype and placed directly  
30 in Trizol reagent (Invitrogen), and homogenized. For *aub* genotypes, Illumina small RNA  
31 libraries were prepared by Fasteris according to a proprietary protocol that depletes for 2S-RNA.  
32 Because two biological replicates prepared at different time points (5/13 and 7/13), they are  
33 analyzed separately. Small RNA libraries for *spnE* and *armi* genotypes were prepared as  
34 described in [47]. In brief, total RNAs were extracted according to the manufacturer's

1 instructions, and size fractionated on a 12% polyacrylamide/urea gel to select for 18-30 nt small  
2 RNAs. Small RNAs were treated with 2S Block oligo (5'-TAC AAC CCT CAA CCA TAT GTA  
3 GTC CAA GCA/3SpC3/-3'), and were subsequently ligated to 3' and 5' adaptors, reverse  
4 transcribed and PCR amplified using NEBNext Multiplex Small RNA Library Prep Set for  
5 Illumina. Small RNA libraries were further purified from a 2% agarose gel and sequenced on a  
6 Illumina NextSeq 500 at the University of Houston Seq-N-Edit Core.

7

## 8 **RNA-Seq**

9 RNA-seq libraries for the studies of *aub* were generated by Weill Cornell Epigenomics Core  
10 according to the protocol of [48]. Briefly, total RNA was extracted from the same ovaries as  
11 above, and mRNAs were isolated using poly-T Dynabeads (Invitrogen) according to the  
12 manufacturer's instructions. Isolated mRNAs were further fragmented using fragmentation  
13 buffer (Ambion), ethanol precipitated, and reverse transcribed using Superscript II (Invitrogen)  
14 and random hexamer primers. Second-strand synthesis was performed using DNA polymerase  
15 I (Promega). cDNA was purified on a MinElute column (Qiagen), repaired with End-IT DNA  
16 repair kit (Epicentre), A-tailed with Klenow enzyme (New England Biolabs), and ligated to  
17 Illumina adaptors. Ligated cDNA was gel purified with the MinElute gel purification kit (Qiagen),  
18 PCR amplified, and gel purified again to make libraries.

19 RNA-seq libraries for the studies of *spnE* and *armi* were prepared by using TruSeq  
20 Stranded Total RNA Library Preparation Kit for Illumina. 50 bp reads from each library were  
21 sequenced on a HiSeq 2000 (Aub and SpnE) and a HiSeq 2500 (Armi) by the Weill-Cornell  
22 Epigenomics Core.

23

24

## 25 **QUANTIFICATION AND STATISTICAL ANALYSIS**

### 26 **Bioinformatic analysis of small RNA-Seq libraries**

27 3' Illumina adaptors were removed from sequencing reads by Cutadapt [36]. Sequence  
28 alignments were made by Bowtie [37]. Contaminating ribosomal RNAs were identified and  
29 removed by mapping sequencing reads to annotated ribosomal RNAs from flybase [49]. To  
30 identify TE derived piRNAs, sequencing reads ranging from 23-30 nucleotides (nt) were aligned  
31 to Repbase [50], allowing for up to 2 mismatches. The number of reads mapped to each TE  
32 family were counted using a Linux shell script. Redundant TE families in Repbase were  
33 identified by checking sequence identity (those consensus sequences that were >90% identical  
34 across >90% of their length were categorized as the same TE family), and reads mapped to

1 multiple redundant TE families were counted only once. Reads mapped to multiple non-  
2 redundant TE families were discarded. To identify miRNAs sequencing reads ranging from 18-  
3 22 nt were aligned to a miRNA reference sequence from Flybase [49]. TE-derived piRNA counts  
4 for each TE family were normalized to the total number of sequenced miRNAs from each library.  
5 Normalized values were used for comparisons of the abundance of piRNAs between libraries.

## 7 **Bioinformatic analysis of RNA-Seq libraries**

8 Removal of ribosomal RNAs, and identification of TE-derived reads was performed as for small  
9 RNA libraries (above) except that 3 mismatches were permitted between sequencing reads and  
10 TE consensus sequences. Non TE-derived reads were aligned to flybase annotated transcripts  
11 in the *D. melanogaster* reference genome (*D. melanogaster* Release 6) [44,49] by TopHat [41],  
12 requiring unique mapping. The number of reads from each protein coding gene were counted  
13 using HTseq-count [42]. Differential expression was estimated concurrently for TEs and protein-  
14 coding genes by DESeq for *aub* [39] and DESeq2 for *spnE* and *armi* [40]. TEs or protein-coding  
15 genes were considered differentially expressed if they exhibited an adjusted  $p$ -value  $< 0.05$  and  
16 a fold-change  $> 2$  when comparing transgenic rescues and mutants, or with an adjusted  $p$ -value  
17  $< 0.05$  and a fold-change  $> 1.5$  when comparing the two transgenic rescues.

## 19 **Ping-pong fraction**

20 Ping-pong fraction was calculated as described in [51]. In brief, small RNA sequencing reads  
21 ranging from 23-30 nt were aligned to TE consensus sequences from Repbase [50], and  
22 redundant TE families in Repbase were identified as described above. For each piRNA, the  
23 proportion of overlapping antisense binding partners whose 5' end occur on the 10th nucleotide  
24 was determined. This fraction was subsequently summed across all piRNAs from a given TE  
25 family, while incorporating the difference in sampling frequency between individual piRNAs.  
26 Finally, this sum was divided by the total number of piRNAs aligned to the TE family of interest.  
27 For multi-mappers, reads were apportioned by the number of times they can be aligned to the  
28 reference.

## 30 **Phasing analysis**

31 Small RNA sequencing reads ranging from 23-30 nt were aligned to Repbase [50], and  
32 redundant TE families in Repbase were identified as described above. To calculate the d1  
33 proportion [16], the number of piRNAs whose 5' end was 1-22 nt downstream piRNA was  
34 determined for every TE-derived piRNA. The fraction of distances corresponding to 1 nt was

1 then calculated. To calculate the +1-U proportion [16], the nucleotide after the 3' end of each  
2 piRNA was determined based on alignment to the reference genome (*D. melanogaster* Release  
3 6) [44]. The frequency of each nucleotide at the +1 position was subsequently summed across  
4 all piRNAs from a given TE family, and the proportion of uridine was calculated. For both  
5 analyses, multiply-mapping reads were apportioned by the number of times they aligned to the  
6 reference.

## 8 **SUPPLEMENTAL INFORMATION**

9 Supplemental Information includes four figures and can be found with this article online at ...

## 11 **ACKNOWLEDGMENTS**

13 This research was supported by the Cornell Center for Comparative and Population Genomics  
14 and the University of Houston Division of Research. E.S.K. was supported by the Cornell Center  
15 for Comparative and Population Genomics, an NIH National Research Service Award  
16 (F32GM090567-01), and NSF-DEB 1457800 (to E.S.K.). Luyang Wang was supported by NSF-  
17 DEB 1457800 (to E.S.K.). We are grateful to Shuqing Ji for assistance with cloning of genomic  
18 transgenes, and Paul MacDonald and Celeste Berg for providing *Drosophila* strains. D.A.B.  
19 was supported by NIGMS R01GM074737.

## 21 **AUTHOR CONTRIBUTIONS**

23 E.S.K. and D.A.B. designed research. E.S.K. and L.W. performed experiments and analyzed  
24 data. E.S.K., L.W. and D.A.B. wrote paper.

## 26 **REFERENCES**

- 27 1. Senti, K.-A., and Brennecke, J. (2010). The piRNA pathway: a fly's perspective on the  
28 guardian of the genome. *Trends Genet.* 26, 499–509.
- 29 2. Klattenhoff, C., and Theurkauf, W. (2008). Biogenesis and germline functions of piRNAs.  
30 *Development* 135, 3–9.
- 31 3. Malone, C.D., Brennecke, J., Dus, M., Stark, A., McCombie, W.R., Sachidanandam, R.,  
32 and Hannon, G.J. (2009). Specialized piRNA pathways act in germline and somatic tissues  
33 of the *Drosophila* ovary. *Cell* 137, 522–535.
- 34 4. Lu, J., and Clark, A.G. (2010). Population dynamics of PIWI-interacting RNAs (piRNAs) and



- 1 their targets in *Drosophila*. *Genome Res.* 20, 212–227.
- 2 5. Khurana, J.S., Wang, J., Xu, J., Koppetsch, B.S., Thomson, T.C., Nowosielska, A., Li, C.,  
3 Zamore, P.D., Weng, Z., and Theurkauf, W.E. (2011). Adaptation to P element transposon  
4 invasion in *Drosophila melanogaster*. *Cell* 147, 1551–1563.
- 5 6. Simkin, A., Wong, A., Poh, Y.-P., Theurkauf, W.E., and Jensen, J.D. (2013). Recurrent and  
6 recent selective sweeps in the piRNA pathway. *Evolution* 67, 1081–1090.
- 7 7. Obbard, D.J., Gordon, K.H.J., Buck, A.H., and Jiggins, F.M. (2009). The evolution of RNAi  
8 as a defence against viruses and transposable elements. *Philos. Trans. R. Soc. Lond. B*  
9 *Biol. Sci.* 364, 99–115.
- 10 8. Blumenstiel, J.P., Erwin, A.A., and Hemmer, L.W. (2016). What Drives Positive Selection in  
11 the *Drosophila* piRNA Machinery? The Genomic Autoimmunity Hypothesis. *Yale J. Biol.*  
12 *Med.* 89, 499–512.
- 13 9. Schüpbach, T., and Wieschaus, E. (1991). Female sterile mutations on the second  
14 chromosome of *Drosophila melanogaster*. II. Mutations blocking oogenesis or altering egg  
15 morphology. *Genetics* 129, 1119–1136.
- 16 10. Kelleher, E.S., Edelman, N.B., and Barbash, D.A. (2012). *Drosophila* Interspecific Hybrids  
17 Phenocopy piRNA-Pathway Mutants. *PLoS Biol.* 10. Available at:  
18 <http://dx.doi.org/10.1371/journal.pbio.1001428>.
- 19 11. Parhad, S.S., Tu, S., Weng, Z., and Theurkauf, W.E. (2017). Adaptive Evolution Leads to  
20 Cross-Species Incompatibility in the piRNA Transposon Silencing Machinery. *Dev. Cell* 43,  
21 60–70.e5.
- 22 12. Brennecke, J., Aravin, A.A., Stark, A., Dus, M., Kellis, M., Sachidanandam, R., and  
23 Hannon, G.J. (2007). Discrete small RNA-generating loci as master regulators of  
24 transposon activity in *Drosophila*. *Cell* 128, 1089–1103.
- 25 13. Li, C., Vagin, V.V., Lee, S., Xu, J., Ma, S., Xi, H., Seitz, H., Horwich, M.D., Syrzycka, M.,  
26 Honda, B.M., *et al.* (2009). Collapse of germline piRNAs in the absence of Argonaute3  
27 reveals somatic piRNAs in flies. *Cell* 137, 509–521.
- 28 14. Haase, A.D., Fenoglio, S., Muerdter, F., Guzzardo, P.M., Czech, B., Pappin, D.J., Chen, C.,  
29 Gordon, A., and Hannon, G.J. (2010). Probing the initiation and effector phases of the  
30 somatic piRNA pathway in *Drosophila*. *Genes Dev.* 24, 2499–2504.
- 31 15. Olivieri, D., Sykora, M.M., Sachidanandam, R., Mechtler, K., and Brennecke, J. (2010). An  
32 in vivo RNAi assay identifies major genetic and cellular requirements for primary piRNA  
33 biogenesis in *Drosophila*. *EMBO J.* 29, 3301–3317.
- 34 16. Han, B.W., Wang, W., Li, C., Weng, Z., and Zamore, P.D. (2015). Noncoding RNA. piRNA-  
35 guided transposon cleavage initiates Zucchini-dependent, phased piRNA production.  
36 *Science* 348, 817–821.
- 37 17. Mohn, F., Handler, D., and Brennecke, J. (2015). piRNA-guided slicing specifies transcripts  
38 for Zucchini-dependent, phased piRNA biogenesis. *Science* 348, 812–817.
- 39 18. Gunawardane, L.S., Saito, K., Nishida, K.M., Miyoshi, K., Kawamura, Y., Nagami, T., Siomi,



- 1 H., and Siomi, M.C. (2007). A slicer-mediated mechanism for repeat-associated siRNA 5'  
2 end formation in *Drosophila*. *Science* 315, 1587–1590.
- 3 19. Andress, A., Bei, Y., Fonslow, B.R., Giri, R., Wu, Y., Yates, J.R., 3rd, and Carthew, R.W.  
4 (2016). Spindle-E cycling between nuage and cytoplasm is controlled by Qin and PIWI  
5 proteins. *J. Cell Biol.* 213, 201–211.
- 6 20. Vourekas, A., Zheng, K., Fu, Q., Maragkakis, M., Alexiou, P., Ma, J., Pillai, R.S.,  
7 Mourelatos, Z., and Wang, P.J. (2015). The RNA helicase MOV10L1 binds piRNA  
8 precursors to initiate piRNA processing. *Genes Dev.* 29, 617–629.
- 9 21. Czech, B., and Hannon, G.J. (2016). One Loop to Rule Them All: The Ping-Pong Cycle and  
10 piRNA-Guided Silencing. *Trends Biochem. Sci.* 41, 324–337.
- 11 22. Handler, D., Olivieri, D., Novatchkova, M., Gruber, F.S., Meixner, K., Mechtler, K., Stark, A.,  
12 Sachidanandam, R., and Brennecke, J. (2011). A systematic analysis of *Drosophila*  
13 TUDOR domain-containing proteins identifies Vreteno and the Tdrd12 family as essential  
14 primary piRNA pathway factors. *EMBO J.* 30, 3977–3993.
- 15 23. Pandey, R.R., Homolka, D., Chen, K.-M., Sachidanandam, R., Fauvarque, M.-O., and Pillai,  
16 R.S. (2017). Recruitment of Armitage and Yb to a transcript triggers its phased processing  
17 into primary piRNAs in *Drosophila* ovaries. *PLoS Genet.* 13, e1006956.
- 18 24. Olivieri, D., Senti, K.-A., Subramanian, S., Sachidanandam, R., and Brennecke, J. (2012).  
19 The Cochaperone Shutdown Defines a Group of Biogenesis Factors Essential for All piRNA  
20 Populations in *Drosophila*. *Mol. Cell.* Available at:  
21 <http://dx.doi.org/10.1016/j.molcel.2012.07.021>.
- 22 25. Huang, H., Li, Y., Szulwach, K.E., Zhang, G., Jin, P., and Chen, D. (2014). AGO3 Slicer  
23 activity regulates mitochondria-nuage localization of Armitage and piRNA amplification. *J.*  
24 *Cell Biol.* 206, 217–230.
- 25 26. Castillo, D.M., Mell, J.C., Box, K.S., and Blumenstiel, J.P. (2011). Molecular evolution under  
26 increasing transposable element burden in *Drosophila*: a speed limit on the evolutionary  
27 arms race. *BMC Evol. Biol.* 11, 258.
- 28 27. Kolaczkowski, B., Hupalo, D.N., and Kern, A.D. (2011). Recurrent adaptation in RNA  
29 interference genes across the *Drosophila* phylogeny. *Mol. Biol. Evol.* 28, 1033–1042.
- 30 28. Levine, M.T., McCoy, C., Vermaak, D., Lee, Y.C.G., Hiatt, M.A., Matsen, F.A., and Malik,  
31 H.S. (2012). Phylogenomic analysis reveals dynamic evolutionary history of the *Drosophila*  
32 heterochromatin protein 1 (HP1) gene family. *PLoS Genet.* 8, e1002729.
- 33 29. Levine, M.T., Vander Wende, H.M., Hsieh, E., Baker, E.P., and Malik, H.S. (2016).  
34 Recurrent Gene Duplication Diversifies Genome Defense Repertoire in *Drosophila*. *Mol.*  
35 *Biol. Evol.* 33, 1641–1653.
- 36 30. Palmer, W.H., Hadfield, J.D., and Obbard, D.J. (2018). RNA-Interference Pathways Display  
37 High Rates of Adaptive Protein Evolution in Multiple Invertebrates. *Genetics* 208, 1585–  
38 1599.
- 39 31. Vermaak, D., Henikoff, S., and Malik, H.S. (2005). Positive selection drives the evolution of

- 1 rhino, a member of the heterochromatin protein 1 family in *Drosophila*. *PLoS Genet.* *1*, 96–  
2 108.
- 3 32. Klattenhoff, C., Xi, H., Li, C., Lee, S., Xu, J., Khurana, J.S., Zhang, F., Schultz, N.,  
4 Koppetsch, B.S., Nowosielska, A., *et al.* (2009). The *Drosophila* HP1 homolog Rhino is  
5 required for transposon silencing and piRNA production by dual-strand clusters. *Cell* *138*,  
6 1137–1149.
- 7 33. Mohn, F., Sienski, G., Handler, D., and Brennecke, J. (2014). The rhino-deadlock-cutoff  
8 complex licenses noncanonical transcription of dual-strand piRNA clusters in *Drosophila*.  
9 *Cell* *157*, 1364–1379.
- 10 34. Yu, B., Lin, Y.A., Parhad, S.S., Jin, Z., Ma, J., Theurkauf, W.E., Zhang, Z.Z., and Huang, Y.  
11 (2018). Structural insights into Rhino-Deadlock complex for germline piRNA cluster  
12 specification. *EMBO Rep.* *19*. Available at: <http://dx.doi.org/10.15252/embr.201745418>.
- 13 35. Maheshwari, S., and Barbash, D.A. (2012). Cis-by-Trans Regulatory Divergence Causes  
14 the Asymmetric Lethal Effects of an Ancestral Hybrid Incompatibility Gene. *PLoS Genet.* *8*,  
15 e1002597.
- 16 36. Martin, M. (2011). Cutadapt removes adapter sequences from high-throughput sequencing  
17 reads. *EMBnet.journal* *17*, 10–12.
- 18 37. Langmead, B., Trapnell, C., Pop, M., and Salzberg, S.L. (2009). Ultrafast and memory-  
19 efficient alignment of short DNA sequences to the human genome. *Genome Biol.* *10*, R25.
- 20 38. Langmead, B., and Salzberg, S.L. (2012). Fast gapped-read alignment with Bowtie 2. *Nat.*  
21 *Methods* *9*, 357–359.
- 22 39. Anders, S., and Huber, W. (2010). Differential expression analysis for sequence count data.  
23 *Genome Biol.* *11*, R106.
- 24 40. Love, M.I., Huber, W., and Anders, S. (2014). Moderated estimation of fold change and  
25 dispersion for RNA-seq data with DESeq2. *Genome Biol.* *15*, 550.
- 26 41. Trapnell, C., Pachter, L., and Salzberg, S.L. (2009). TopHat: discovering splice junctions  
27 with RNA-Seq. *Bioinformatics* *25*, 1105–1111.
- 28 42. Anders, S., Pyl, P.T., and Huber, W. (2014). HTSeq - A Python framework to work with  
29 high-throughput sequencing data. *bioRxiv*, 002824. Available at:  
30 <https://www.biorxiv.org/content/early/2014/08/19/002824> [Accessed January 8, 2019].
- 31 43. Groth, A.C., Fish, M., Nusse, R., and Calos, M.P. (2004). Construction of transgenic  
32 *Drosophila* by using the site-specific integrase from phage phiC31. *Genetics* *166*, 1775–  
33 1782.
- 34 44. Hoskins, R.A., Carlson, J.W., Wan, K.H., Park, S., Mendez, I., Galle, S.E., Booth, B.W.,  
35 Pfeiffer, B.D., George, R.A., Svirskas, R., *et al.* (2015). The Release 6 reference sequence  
36 of the *Drosophila melanogaster* genome. *Genome Res.* *25*, 445–458.
- 37 45. Hu, T.T., Eisen, M.B., Thornton, K.R., and Andolfatto, P. (2013). A second-generation  
38 assembly of the *Drosophila simulans* genome provides new insights into patterns of  
39 lineage-specific divergence. *Genome Res.* *23*, 89–98.

- 1 46. Venken, K.J.T., He, Y., Hoskins, R.A., and Bellen, H.J. (2006). P[acman]: a BAC transgenic  
2 platform for targeted insertion of large DNA fragments in *D. melanogaster*. *Science* 314,  
3 1747–1751.
- 4 47. Wickersheim, M.L., and Blumenstiel, J.P. (2013). Terminator oligo blocking efficiently  
5 eliminates rRNA from *Drosophila* small RNA sequencing libraries. *Biotechniques* 55, 269–  
6 272.
- 7 48. Marioni, J.C., Mason, C.E., Mane, S.M., Stephens, M., and Gilad, Y. (2008). RNA-seq: an  
8 assessment of technical reproducibility and comparison with gene expression arrays.  
9 *Genome Res.* 18, 1509–1517.
- 10 49. Gramates, L.S., Marygold, S.J., Santos, G. dos, Urbano, J.-M., Antonazzo, G., Matthews,  
11 B.B., Rey, A.J., Tabone, C.J., Crosby, M.A., Emmert, D.B., *et al.* (2017). FlyBase at 25:  
12 looking to the future. *Nucleic Acids Res.* 45, D663–D671.
- 13 50. Bao, W., Kojima, K.K., and Kohany, O. (2015). Repbase Update, a database of repetitive  
14 elements in eukaryotic genomes. *Mob. DNA* 6, 11.
- 15 51. Brennecke, J., Malone, C.D., Aravin, A.A., Sachidanandam, R., Stark, A., and Hannon, G.J.  
16 (2008). An epigenetic role for maternally inherited piRNAs in transposon silencing. *Science*  
17 322, 1387–1392.

18

19 **SUPPLEMENTARY MATERIALS**

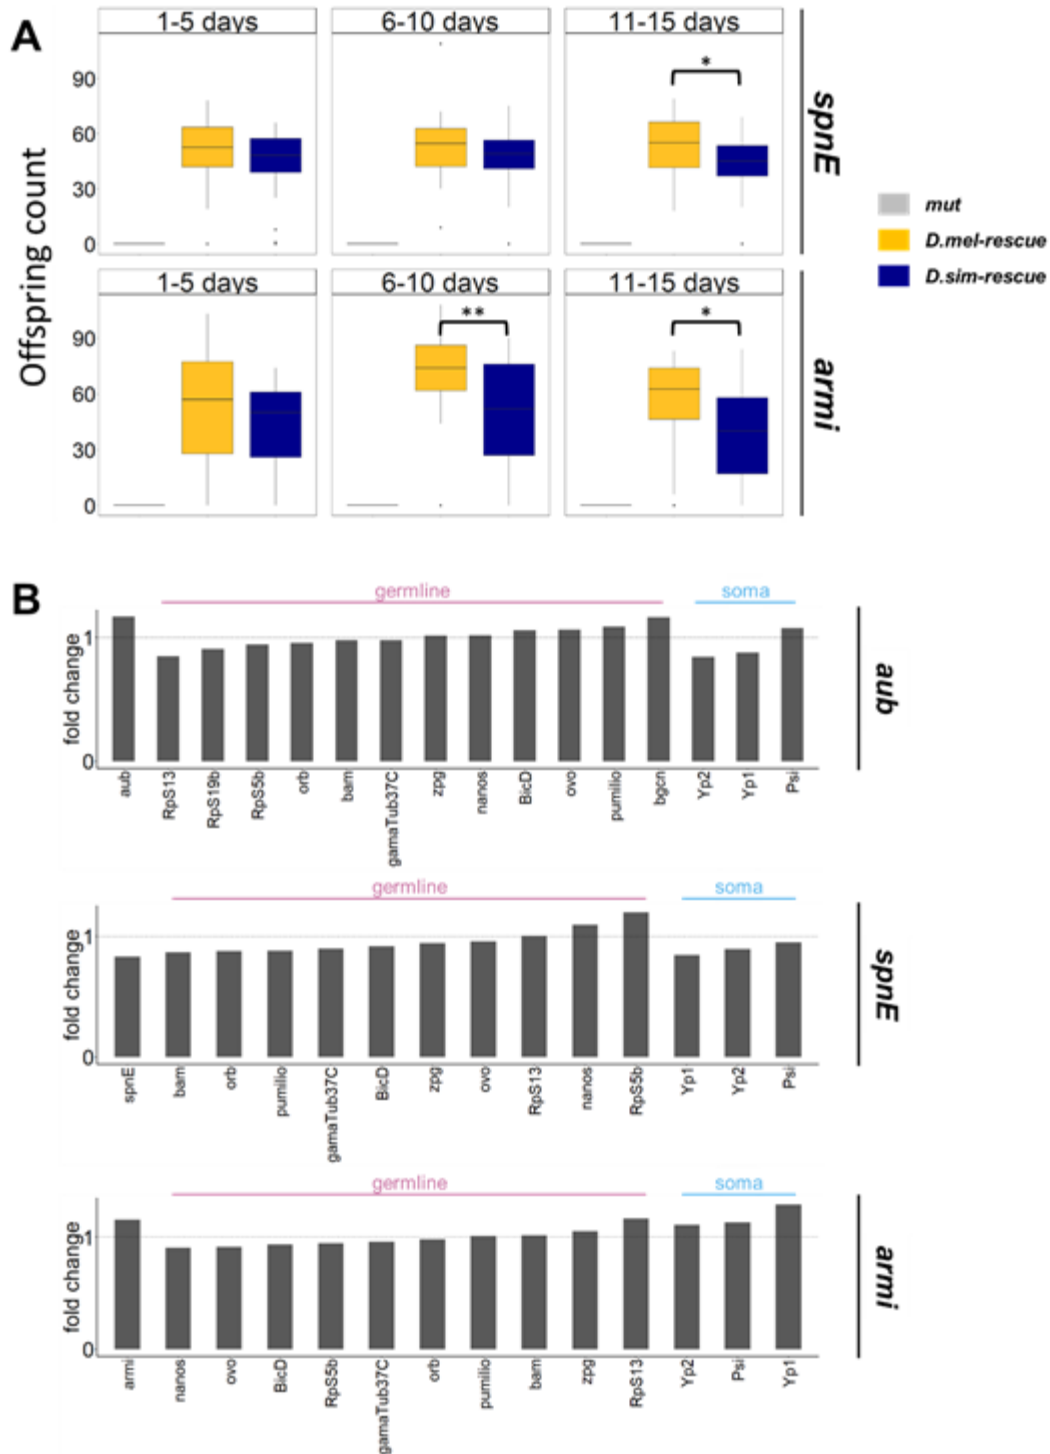

1  
2 **Figure S1.** (A). Functional divergence in two piRNA pathway proteins, *spnE* and *armi*, between  
3 species affects female fertility. PhiC31-mediated site-specific integrations of *D. simulans* and *D.*  
4 *melanogaster* are compared for their ability to complement trans-heterozygous mutants for  
5 female fertility across three different age classes. Females with the *D. simulans* *spnE* transgene  
6 are significantly less fertile across the experiment (Repeated measures ANOVA,  $F_{1,172} = 4.043$ ,  $p$   
7  $< 0.05$ ) and at the third time point we measured (11-15 days,  $t_{56} = 2.304$ ,  $p < 0.05$ ). Females

1 with the *D. simulans armi* transgene are significantly less fertile across the experiment  
2 (Repeated measures ANOVA,  $F_{1,175} = 8.824$ ,  $p < 0.01$ ) and at the second time (06-10 days,  $t_{57} =$   
3  $3.0718$ ,  $p < 0.01$ ) and the third time point we measured (11-15 days,  $t_{57} = 2.5915$ ,  $p < 0.05$ ).  
4 Samples sizes are 25-35 females. \* denotes  $p \leq 0.05$ . \*\* denotes  $p \leq 0.01$ . \*\*\* denotes  $p \leq$   
5 0.001.

6 (B). Expression level of *aub*, *spnE* and *armi*, and the ovarian germ cell, somatic cell proportion  
7 were similar between *D. melanogaster* transgenic rescue and *D. simulans* transgenic rescue.  
8 Fold change of expression level of *aub*, *spnE*, *armi*, germline-specific genes and soma-specific  
9 genes between two transgenic rescues were shown.

10  
11  
12  
13  
14  
15  
16  
17

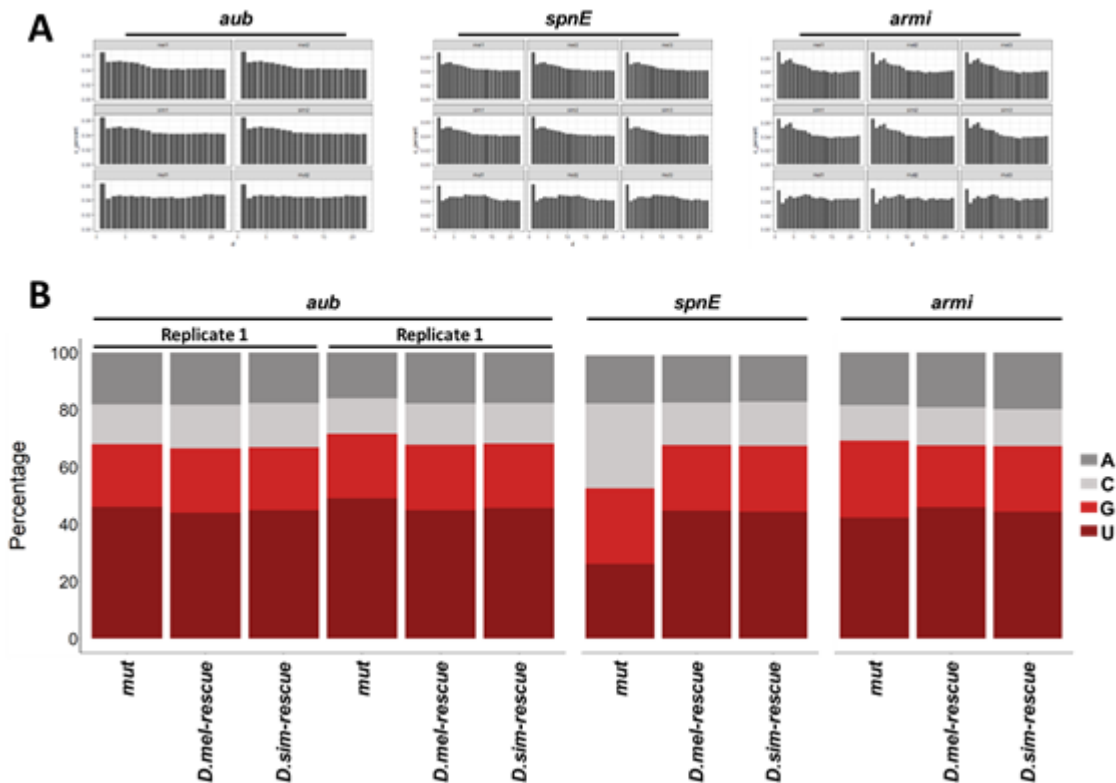

18  
19 **Figure S2.** Observed peaks of 1nt distance (A) and +1 U bias (B) among each genotype for each  
20 protein studied.

1

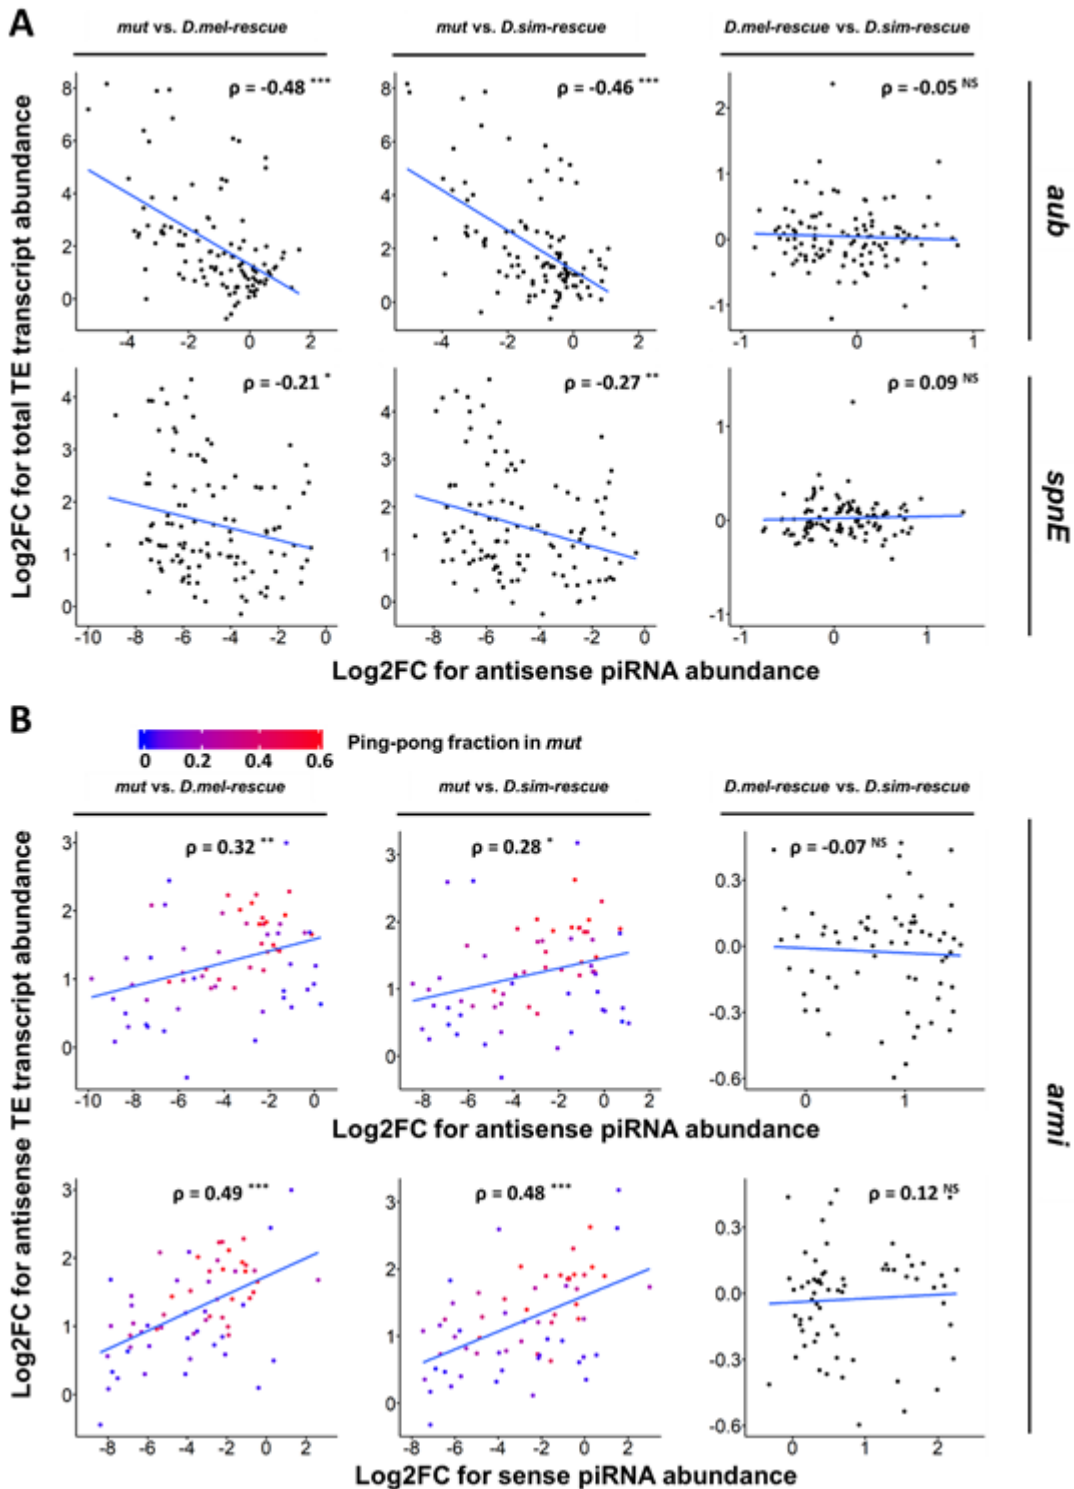

2

3 **Figure S3.** Relationship of changes in TE transcript abundance and piRNA abundance similarly

4 observed between mutant and rescues is lost when comparing two rescues.

5 (A). Relationship between changes in total TE transcript abundance and changes in antisense

1 piRNA abundance for each comparison for *aub* and *spnE*. Negative correlations suggest that  
2 loss of piRNAs explains TE transcriptional derepression in *aub* and *spnE* mutants, but is  
3 unrelated to differences in TE transcription between transgenic rescues.  
4 (B). Relationship between changes in antisense TE transcript abundance and changes in  
5 antisense or sense piRNA abundance for each comparison for *armi*. Positive correlations  
6 suggest that antisense TE transcription offsets piRNA losses in *armi* mutant, but is unrelated to  
7 differences in piRNA production between rescues. Dot color indicates the ping-pong fraction of  
8 each TE family in the *armi* mutant, and demonstrates that more robust ping-pong in the mutant  
9 is associated with higher levels of anti-sense transcription and reduced piRNA loss.  $\rho$ :  
10 Spearman's rank correlation coefficient. Blue line indicates the least-squares regression line. NS  
11 denotes  $p > 0.05$ . \* denotes  $p \leq 0.05$ . \*\* denotes  $p \leq 0.01$ . \*\*\* denotes  $p \leq 0.001$ .



1  
2

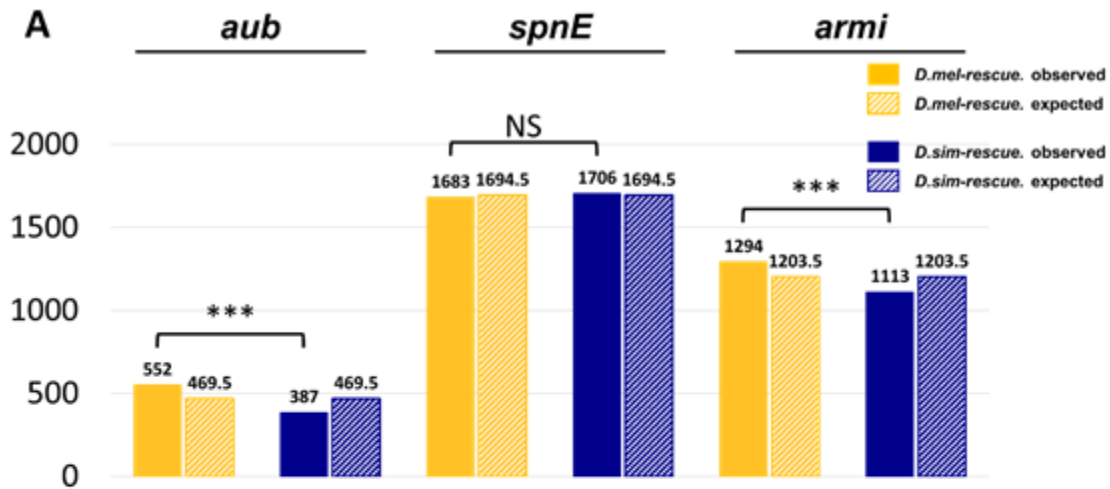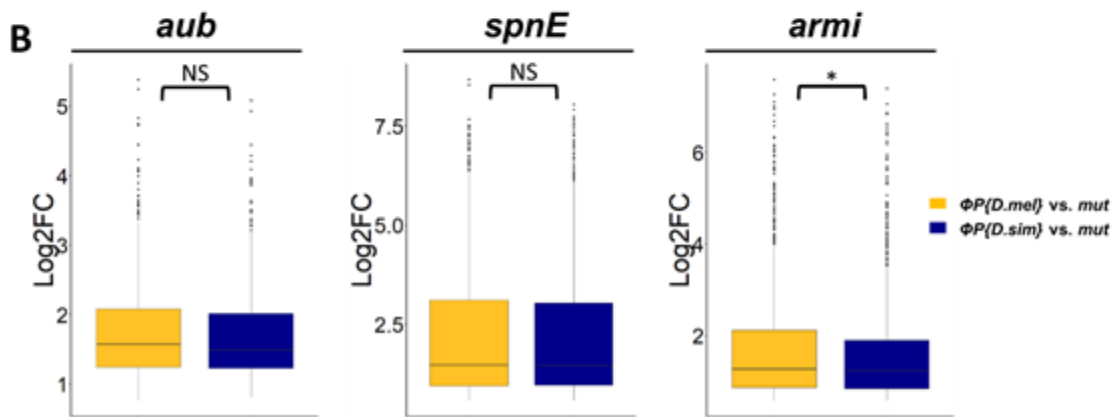

3  
4 **Figure S4.** (A). The number of genes whose corresponding piRNA abundance is increased (>1.5  
5 fold) in the presence of each transgene as compared to the mutant. Log2 fold-change values  
6 were based on two biological replicates for *aub* and three biological replicates for *spnE* and  
7 *armi*, and were obtained from a DESeq2 analysis (adjusted  $p < 0.05$ ). Statistical significance was  
8 assessed by the Pearson's Chi-squared test.

9 (B). Log2 fold-changes of abundance of piRNAs mapped to protein-coding genes between  
10 rescues and mutant from Figure S4A are compared between two transgenic rescues.  
11 Comparisons were made by a Wilcoxon rank sum test. NS denotes  $p > 0.05$ . \* denotes  $p \leq 0.05$ .  
12 \*\*\* denotes  $p \leq 0.001$ .

13  
14
